# Supplementary material for: Regioisomeric BODIPY derivatives: second-order nonlinear optical properties under an external electric field
Source: Royal Society of Chemistry journal article supplement (doi:10.1039/d0nj05626j), 2021-01-01
Supplement: d0nj05626j1.pdf [file d0nj05626j1.pdf]

Supporting Information

**Regioisomeric BODIPY Derivatives: Second-order Nonlinear Optical Properties  
under the External Electric Field**

Chu-Lin Qu <sup>a</sup>, Zhong-Min Su <sup>ab,\*</sup> and Feng-Wei Gao <sup>b,\*</sup>

<sup>[a]</sup> College of Chemistry, Jilin University, Changchun, 130012, People's Republic of China.

<sup>[b]</sup> School of Chemistry & Environmental Engineering, Changchun University of Science and Technology, Changchun, 130022, People's Republic of China.

**Table of Contents**

1. The  $\mu_g$  and the  $E_{\text{gap}}$  values of **m-AD** and **p-AD** by the B3LYP functional in **Table S1**.  
S2
2. The first hyperpolarizabilities ( $\beta_{\text{tot}}$ ) values of **m-AD** and **p-AD** by the CAM-BLYP, the M06-2X and the BHandHLYP functionals in **Table S2**.  
S3
3. The first hyperpolarizabilities ( $\beta_{\text{tot}}$ ) of **m-AD** and **p-AD** by the M06-2X method with different basis sets (6-31G\*, 6-31+G\* and 6-31G\*\*) in **Table S3**.  
S4
4. Cartesian coordinates of the optimized structures of **m-AD** and **p-AD**.  
S5-7

**Table S1.** The  $\mu_g$  (Debye, D) and  $E_{\text{gap}}$  (eV) values of **m-AD** and **p-AD** by using the B3LYP functional.

|                       | <b>m-AD</b> | <b>p-AD</b> |
|-----------------------|-------------|-------------|
| $\mu_g$ (D)           | 5.33        | 6.17        |
| $E_{\text{gap}}$ (eV) | 2.48        | 2.51        |

The dipole moments of ground state ( $\mu_g$ ) are calculated in Table S1, the  $\mu_g$  values of **m-AD** and **p-AD** are 5.33 D and 6.17 D, respectively. The energy gap ( $E_{\text{gap}}$ ) of the highest occupied (HOMO) to lowest unoccupied molecular orbital (LUMO) of **p-AD** (2.51 eV) is higher than that of **m-AD** (2.48 eV).

**Table S2.** The first hyperpolarizabilities ( $\beta_{\text{tot}}$ , a.u.) of **m-AD** and **p-AD** by using the M06-2X, the CAM-BLYP and the BHandHLYP functionals.

|           |             | $\beta_x$           | $\beta_y$           | $\beta_z$           | $\beta_{\text{tot}}$ |
|-----------|-------------|---------------------|---------------------|---------------------|----------------------|
| M06-2X    | <b>m-AD</b> | $9.07 \times 10^2$  | $-3.38 \times 10^2$ | $-3.61 \times 10^2$ | $1.03 \times 10^3$   |
|           | <b>p-AD</b> | $7.484 \times 10^3$ | $3.39 \times 10^2$  | $1.27 \times 10^2$  | $7.49 \times 10^3$   |
| BHandHLYP | <b>m-AD</b> | $5.99 \times 10^2$  | $-3.54 \times 10^2$ | $-4.06 \times 10^2$ | $8.05 \times 10^2$   |
|           | <b>p-AD</b> | $6.96 \times 10^3$  | $3.00 \times 10^2$  | $1.25 \times 10^2$  | $6.97 \times 10^3$   |
| CAM-BLYP  | <b>m-AD</b> | $7.17 \times 10^2$  | $-3.38 \times 10^2$ | $-3.83 \times 10^2$ | $8.81 \times 10^2$   |
|           | <b>p-AD</b> | $6.42 \times 10^3$  | $3.02 \times 10^2$  | $1.20 \times 10^2$  | $6.43 \times 10^3$   |

Table S2 results show that the  $\beta_{\text{tot}}$  values of **m-AD** and **p-AD** by using the BHandHLYP and the CAM-B3LYP functionals are close to that obtained by the M06-2X functional.

**Table S3.** The first hyperpolarizabilities ( $\beta_{\text{tot}}$ , au) of **m-AD** and **p-AD** by using the M06-2X method with different basis sets (6-31G\*, 6-31+G\* and 6-31G\*\*).

|             |                      | 6-31G*              | 6-31+G*             | 6-31G**             |
|-------------|----------------------|---------------------|---------------------|---------------------|
| <b>m-AD</b> | $\beta_x$            | $9.07 \times 10^2$  | $8.31 \times 10^2$  | $9.08 \times 10^2$  |
|             | $\beta_y$            | $-3.38 \times 10^2$ | $-3.48 \times 10^2$ | $-3.50 \times 10^2$ |
|             | $\beta_z$            | $-3.61 \times 10^2$ | $-4.19 \times 10^2$ | $-3.66 \times 10^2$ |
|             | $\beta_{\text{tot}}$ | $1.03 \times 10^3$  | $9.93 \times 10^2$  | $1.04 \times 10^3$  |
| <b>p-AD</b> | $\beta_x$            | $7.48 \times 10^3$  | $7.97 \times 10^3$  | $7.50 \times 10^3$  |
|             | $\beta_y$            | $3.39 \times 10^2$  | $3.29 \times 10^2$  | $3.44 \times 10^2$  |
|             | $\beta_z$            | $1.27 \times 10^2$  | $1.40 \times 10^2$  | $1.28 \times 10^2$  |
|             | $\beta_{\text{tot}}$ | $7.49 \times 10^3$  | $7.98 \times 10^3$  | $7.50 \times 10^3$  |

From Table S3, effect of basis sets (6-31G\*, 6-31+G\* and 6-31G\*\*) on the first hyperpolarizabilities of **m-AD** and **p-AD** are evaluated. The results from three basis sets present the same trend of the  $\beta_{\text{tot}}$  value, and the  $\beta_{\text{tot}}$  values are very close.

**Cartesian coordinates of the optimized structures of m-AD and p-AD.**

**(1) m-AD**

| <b>m-AD</b> |             | The total energy = 2323.2452 a.u. |             |  |
|-------------|-------------|-----------------------------------|-------------|--|
| Atom        | X           | Y                                 | Z           |  |
| C           | 6.76872400  | -1.12366700                       | 1.75720400  |  |
| C           | 6.17359200  | -2.38300600                       | 1.97507200  |  |
| N           | 6.00238000  | -0.37841900                       | 0.94826000  |  |
| C           | 4.98122600  | -2.38784000                       | 1.26399500  |  |
| C           | 4.87816400  | -1.13040400                       | 0.60872900  |  |
| C           | 3.88529800  | -0.60599900                       | -0.23674000 |  |
| C           | 4.01782300  | 0.69475000                        | -0.75474100 |  |
| C           | 3.23465400  | 1.40266100                        | -1.70662600 |  |
| N           | 5.10636700  | 1.49638100                        | -0.41644100 |  |
| C           | 3.85699600  | 2.62538100                        | -1.92115900 |  |
| C           | 5.00917300  | 2.64016800                        | -1.10913000 |  |
| B           | 6.24445700  | 1.13161800                        | 0.59797500  |  |
| F           | 7.47919300  | 1.29485400                        | 0.00064700  |  |
| F           | 6.12563500  | 1.89942300                        | 1.74208300  |  |
| H           | 6.57867600  | -3.17750400                       | 2.58645600  |  |
| C           | -1.06844500 | -1.13675500                       | -0.46222500 |  |
| C           | -1.42931400 | 0.17640800                        | -0.34325100 |  |
| S           | -2.46309000 | -2.21563000                       | -0.27804100 |  |
| C           | -3.53917600 | -0.84875800                       | -0.04876000 |  |
| C           | -2.82710000 | 0.37797800                        | -0.10559500 |  |
| H           | -0.73543200 | 1.00267800                        | -0.44536400 |  |
| C           | -3.51195100 | 1.60841500                        | 0.05740800  |  |
| C           | -4.89677800 | 1.53256100                        | 0.27625100  |  |
| C           | -5.60824000 | 0.30484900                        | 0.33647900  |  |
| C           | -4.92273000 | -0.92495000                       | 0.17093200  |  |
| S           | -5.97399800 | 2.90059600                        | 0.51089400  |  |
| C           | -7.34246400 | 1.82107300                        | 0.68338800  |  |
| C           | -7.01203700 | 0.50911700                        | 0.57181800  |  |
| H           | -7.72185200 | -0.30596600                       | 0.65006100  |  |
| C           | -2.82931400 | 2.85462700                        | 0.00477000  |  |
| C           | -5.60224400 | -2.17346000                       | 0.22450900  |  |
| C           | -2.25589800 | 3.92353000                        | -0.03606000 |  |
| C           | -6.17210000 | -3.24399200                       | 0.26871600  |  |
| C           | -1.57128700 | 5.21079700                        | -0.08217200 |  |
| H           | -1.36841400 | 5.51768300                        | -1.11585400 |  |
| H           | -0.61176700 | 5.16939600                        | 0.44743900  |  |
| H           | -2.17755500 | 5.99565700                        | 0.38523600  |  |
| C           | -6.85390400 | -4.53254200                       | 0.32183800  |  |
| H           | -7.42468900 | -4.64256500                       | 1.25213300  |  |

|   |             |             |             |
|---|-------------|-------------|-------------|
| H | -6.13634100 | -5.35990300 | 0.27107800  |
| H | -7.55504300 | -4.64723700 | -0.51415900 |
| C | 0.45610900  | -2.95792900 | -1.27445100 |
| C | 0.27120400  | -1.68452200 | -0.70700100 |
| C | 1.73704400  | -3.45770300 | -1.49807300 |
| C | 2.86035000  | -2.70448900 | -1.16354700 |
| C | 1.41166000  | -0.93263700 | -0.37500000 |
| C | 2.70289300  | -1.42629600 | -0.60027800 |
| H | 1.29470100  | 0.03341200  | 0.10398900  |
| H | 1.86024300  | -4.43889100 | -1.94770700 |
| H | -8.32471300 | 2.23987600  | 0.86034700  |
| H | 4.25151000  | -3.18301100 | 1.21076600  |
| H | 7.69490400  | -0.72723000 | 2.15173000  |
| H | -0.40806000 | -3.55127800 | -1.55906200 |
| H | 3.85717200  | -3.08777100 | -1.35603300 |
| H | 2.33933000  | 1.02837800  | -2.18220700 |
| H | 3.54300900  | 3.41563400  | -2.58907600 |
| H | 5.76267800  | 3.40930400  | -1.00335500 |

(2) **p-AD**

| <b>p-AD</b> | The total energy = -2323.2460 a.u. |             |             |
|-------------|------------------------------------|-------------|-------------|
| Atom        | X                                  | Y           | Z           |
| C           | 6.99829800                         | 2.26501000  | -0.97682500 |
| C           | 5.90257600                         | 3.07135900  | -1.34441900 |
| N           | 6.57099200                         | 1.10452800  | -0.45830200 |
| C           | 4.75674200                         | 2.34951100  | -1.03705500 |
| C           | 5.17693400                         | 1.11637000  | -0.46824000 |
| C           | 4.43949900                         | 0.01982900  | 0.01584400  |
| C           | 5.11113200                         | -1.11157900 | 0.51595800  |
| C           | 4.61866000                         | -2.27695500 | 1.16401700  |
| N           | 6.50268700                         | -1.18343700 | 0.50946300  |
| C           | 5.72007500                         | -3.04011700 | 1.52881700  |
| C           | 6.86146500                         | -2.32703500 | 1.11085600  |
| B           | 7.48315300                         | -0.11598300 | -0.08604100 |
| F           | 8.41522200                         | 0.25137300  | 0.86519000  |
| F           | 8.08838900                         | -0.60895700 | -1.22794300 |
| H           | 5.96100400                         | 4.05648800  | -1.78629100 |
| C           | -1.34493200                        | 0.14006600  | 0.00869700  |
| C           | -2.19680600                        | -0.92182200 | -0.12603000 |
| S           | -2.22984300                        | 1.66534800  | 0.19407200  |
| C           | -3.76888400                        | 0.82933900  | 0.09515800  |
| C           | -3.58280200                        | -0.56698800 | -0.08305100 |

|   |             |              |             |
|---|-------------|--------------|-------------|
| H | -1.86616200 | -1.94889700  | -0.22691300 |
| C | -4.70419400 | -1.42844200  | -0.18704100 |
| C | -5.96943100 | -0.82484800  | -0.10991300 |
| C | -6.15487100 | 0.57256300   | 0.06437700  |
| C | -5.03306400 | 1.43265100   | 0.17190400  |
| S | -7.51186600 | -1.65989200  | -0.21265700 |
| C | -8.36939600 | -0.14447300  | -0.02351400 |
| C | -7.54742000 | 0.92769800   | 0.10944600  |
| H | -7.89236500 | 1.94710600   | 0.23628800  |
| C | -4.55465900 | -2.83156800  | -0.36222900 |
| C | -5.18023200 | 2.83616000   | 0.35024100  |
| C | -4.44333900 | -4.03079700  | -0.51236600 |
| C | -5.29289500 | 4.03479500   | 0.50292800  |
| C | -4.31704600 | -5.47281100  | -0.69275600 |
| H | -5.30132900 | -5.94162500  | -0.80798000 |
| H | -3.82343200 | -5.94045500  | 0.16819200  |
| H | -3.72662700 | -5.71247800  | -1.58573500 |
| C | -5.42426800 | 5.47599200   | 0.68646300  |
| H | -6.02374800 | 5.71107600   | 1.57457400  |
| H | -5.91145300 | 5.94472100   | -0.17752900 |
| H | -4.44255000 | 5.94757100   | 0.81209000  |
| C | 0.82499900  | -0.94691500  | -0.57420800 |
| C | 0.12011000  | 0.12292400   | 0.01103600  |
| C | 2.21301600  | -0.98610400  | -0.55967300 |
| C | 2.95975100  | 0.05806500   | 0.01589400  |
| C | 0.87095900  | 1.16099500   | 0.59297100  |
| C | 2.26074200  | 1.13468300   | 0.58760900  |
| H | 0.36084600  | 1.98870900   | 1.07723300  |
| H | 2.73223800  | -1.81333500  | -1.03334700 |
| H | 2.81453800  | 1.93805000   | 1.06286400  |
| H | 5.72092700  | -3.98900900  | 2.04723300  |
| H | -9.45173800 | -0.14825100  | -0.02326900 |
| H | 3.73113800  | 2.64704200   | -1.20147600 |
| H | 8.05744400  | 2.46354100   | -1.07339600 |
| H | 7.90710600  | -2.58048500  | 1.22408800  |
| H | 3.57737300  | -2.49608200  | 1.35197900  |
| H | 0.27722800  | -1.743483000 | -1.06755000 |
